# Supplementary material for: The Effect of Magnesium Intake on Stroke Incidence: A Systematic Review and Meta-Analysis With Trial Sequential Analysis
Source: Front Neurol. 2019 Aug 7;10:852. doi: 10.3389/fneur.2019.00852 (PMC6692462; doi:10.3389/fneur.2019.00852)
Supplement: Table S3 — Methodological quality assessments of the studies included with the newcastle-ottawa scales. [file Table_3.DOCX]

**Table S3. Methodological Quality Assessments of Included Studies with the Newcastle-Ottwa Scales**

|  | Study | Selection | | | | Comparability | Outcome | | | Total score |
| --- | --- | --- | --- | --- | --- | --- | --- | --- | --- | --- |
| Exposed cohort | Nonexposed cohort | Ascertainment of exposure | Outcome of interest | Assessment of outcome | Length of follow-up | Adequacy of follow-up |
| 1998 | Ascherio et al,12 | * | * | * | * | ** | * | * | * | 9 |
| 1999 | Iso et al,13 | * | * | * | * | ** | * | * | * | 9 |
| 2005 | Song et al,14 | * | * | * | * | ** | * | * | * | 9 |
| 2008 | Larsson et al,15 | * | * | * | * | ** | * | * | * | 9 |
| 2008 | Weng et al,16 | * | * | * | * | ** | * | * | * | 9 |
| 2009 | Ohira et al,17 | * | * | * | * | ** | * | * | * | 9 |
| 2011 | Larsson et al,18 | * | * | * | * | ** | * | * | * | 9 |
| 2012 | Zhang et al,19 | * | * | * | * | ** | * | * | * | 9 |
| 2013 | Lin et al,20 | * | * | * | * | ** | * | * | * | 9 |
| 2013 | Sluijs et al,21 | * | * | * | * | ** |  | * | * | 8 |
| 2014 | Sluijs et al,22 | * | * | * | * | ** | * | * | * | 9 |
| 2015 | Adebamowo et al,23 | * | * | * | * | ** | * | * | * | 9 |
| 2015 | Adebamowo et al (2),24 | * | * | * | * | ** | * | * | * | 9 |
| 2015 | Bain et al,25 | * | * | * | * | ** | * | * | * | 9 |
| 2017 | Kokubo et al,26 | * | * | * | * | ** | * | * | * | 9 |
